# Supplementary material
Source: HighWire-hosted journal article supplement (https://bmjopen.bmj.com/content/12/8/e060882)
Supplement: inline-supplementary-material-1 [file inline-supplementary-material-1.pdf]

**Supplemental Table 1 Participating centers in the study**

| <b>Province</b> | <b>Participated</b>                                          | <b>Local PI</b>         |
|-----------------|--------------------------------------------------------------|-------------------------|
| Beijing         | Fuwai Hospital                                               | Yongjian Wu             |
| Guangdong       | Guangdong Provincial Hospital                                | Jianfang Luo            |
| Beijing         | Beijing Anzhen Hospital                                      | Wei Liu, Haibo Zhang    |
| Chongqing       | Xinqiao Hospital                                             | Shiyong Yu              |
| Sichuan         | West China Hospital                                          | Mao Chen, Yingqiang Guo |
| Shanghai        | Zhongshan Hospital affiliated to Fudan University            | Daxin Zhou              |
| Hubei           | Asia Heart Disease Hospital                                  | Xi Su                   |
| Hunan           | The Second Xiangya Hospital of Central South University      | Xinqun Hu               |
| Henan           | The First Hospital affiliated to Zhengzhou University        | Chunguang Qiu           |
| Fujian          | Union Hospital affiliated to Fujian Medical University       | Lianglong Chen          |
| Shanxi          | Xijing Hospital                                              | Lin Tao, Jian Yang      |
| Shanghai        | Shanghai Changhai Hospital                                   | Xianxian Zhao           |
| Henan           | Henan Provincial Hospital                                    | Chuan Yu Gao            |
| Liaoning        | Northern Hospital                                            | Quanmin Jing            |
| Anhui           | Anhui Provincial Hospital                                    | Likun Ma                |
| Hunan           | Xiangya Hospital Central South University                    | Zaixin Yu               |
| Guizhou         | Guizhou Provincial Hospital                                  | Qiang Wu                |
| Jiangsu         | Nanjing First Hospital                                       | Shaoliang Chen          |
| Jiangxi         | The First Hospital affiliated to Nanchang University         | Zheqi Zheng             |
| Jiangsu         | Nanjing Gulou Hospital                                       | Biao Xu                 |
| Zhejiang        | The Second Hospital affiliated to Zhejiang University        | Xiambao Liu             |
| Jiangxi         | The Second Hospital affiliated to Nanchang University        | Yanqing Wu              |
| Heilongjiang    | The Second Hospital affiliated to Haerbin Medical University | Bo Yu                   |
| Xinjiang        | The First Hospital affiliated to Xinjiang Medical University | Xiang Ma                |
| Tianjin         | Taida International Cardiovascular Hospital                  | Zhigang Liu             |
| Tianjin         | Tianjin Chest Hospital                                       | Hongliang Cong          |
| Shanghai        | Ruijin Hospital affiliated to Shanghai Jiaotong University   | Ruiyan Zhang            |
| Shandong        | Linyi People's Hospital                                      | Yanjin We               |
| Shandong        | Hospital affiliated to Jinin Medical School                  | Qingxian Li             |
| Shandong        | Qingdao Fuwai Hospital                                       | Xianyan Jiang           |
| Sichuan         | Sichuan Provincial Hospital                                  | Jianhong Tao            |

|                |                                                             |                 |
|----------------|-------------------------------------------------------------|-----------------|
| Zhejiang       | Shaoyifu Hospital affiliated to Zhejiang University         | Guosheng Fu     |
| Beijing        | Army General Hospital                                       | Changfu Liu     |
| Shanxi         | The First Hospital affiliated to Xian Jiaotong University   | Zuyi Yuan       |
| Gansu          | The First Hospital affiliated to Lanzhou University         | Zheng Zhang     |
| Jilin          | The Second Hospital affiliated to Jilin University          | Bin Liu         |
| Yunnan         | The First Hospital affiliated to Kunming Medical School     | Tao Guo         |
| Jiangsu        | Xuzhou Central Hospital                                     | Bin Han         |
| Chongqing      | Southwest Hospital                                          | Zhihui Zhang    |
| Jiangxi        | Jiangxi Provincial Hospital                                 | Lang Hong       |
| Guangdong      | Shenzhen Sunyixian Cardiovascular Hospital                  | Qiang Liu       |
| Heilongjiang   | The First Hospital affiliated to Haerbin Medical University | Yue Liu         |
| Henan          | Zhengzhou Seventh People's Hospital                         | Yiqiang Yuan    |
| Ningxia        | General Hospital affiliated to Ningxia Medical University   | Saobin Jia      |
| Liaoning       | Zhongshan Hospital affiliated to Dalian Medical University  | Xiaoming Bian   |
| Sichuan        | Nanchong Central Hospital                                   | Haoyu Wang      |
| Guangdong      | Meizhou People's Hospital                                   | Wei Zhong       |
| Fujian         | First Hospital affiliated to Xiamen University              | Weihua Ke       |
| Anhui          | Yijishan Hospital affiliated to Wannan Medical School       | Yongshen Ke     |
| Guangdong      | Sunyixian Hospital affiliated to Zhongshan University       | Jingfeng Wang   |
| Fujian         | Quanzhou First Hospital                                     | Rong Lin        |
| Shanghai       | Shanghai Changzheng Hospital                                | Chun Liang      |
| Shandong       | Tantai Yuhuangding Hospital                                 | Chuanhuan Zhang |
| Anhui          | Hospital affiliated to Bengbu Medical School                | Hongju Wang     |
| Shanxi         | Shanxi Cardiovascular Hospital                              | Jian An         |
| Inner Mongolia | Hospital affiliated to Inner Mongolia Medical University    | Yuexi Wang      |
| Guangdong      | Southern Hospital affiliated to Southern Medical University | Yuqing Hou      |
| Qinghai        | Hospital affiliated to Qinghai University                   | Weijun Liu      |
| Gansu          | Gansu Provincial Hospital                                   | Ping Xie        |
| Tianjin        | Tianjin First Central Hospital                              | Chengzhi Lu     |
| Guangxi        | The First Hospital affiliated to Guangxi Medical University | Weifeng Wu      |
| Zhejiang       | The First Hospital affiliated to Zhejiang University        | Li Zhang        |
| Sahnxi         | Tangdu Hospital affiliated to Forth Army Medical University | Haichang Wang   |

---

|                |                                                        |               |
|----------------|--------------------------------------------------------|---------------|
| Hubei          | Wuhan Union Hospital                                   | Xiang Cheng   |
| Sichuan        | Hospital affiliated to Southwestern Medical University | Zhongcai Fan  |
| Guangdong      | Shenzhen People's Hospital                             | Shaohong Dong |
| Shanxi         | Shanxi Provincial Hospital                             | Hong Zhang    |
| Shanghai       | Shanghai Chest Hospital                                | Xinkai Qu     |
| Inner Mongolia | The First Hospital affiliated to Baotou Medical School | Hanjun Pei    |

---
